# Supplementary material for: Facile and green decoration of Pd nanoparticles on macroporous carbon by polyoxometalate with enhanced electrocatalytic ability
Source: Royal Society of Chemistry journal article supplement (doi:10.1039/c6ra06643g), 2016-01-01
Supplement: c6ra06643g1.pdf [file c6ra06643g1.pdf]

## Facile and green decoration of Pd nanoparticles on macroporous carbon by polyoxometalate with enhanced electrocatalytic ability

Yufan Zhang\*, Huan Wang, Qianqian Yao, Fei Yan, Chunyan Cui, Mengyuan Sun and Hongyi Zhang\*

*Key Laboratory of Analytical Science and Technology of Hebei Province, College of Chemistry and Environmental Science, Key Laboratory of Medicinal Chemistry and Molecular Diagnosis, Ministry of Education, Hebei University, 071002 Baoding, P R China*

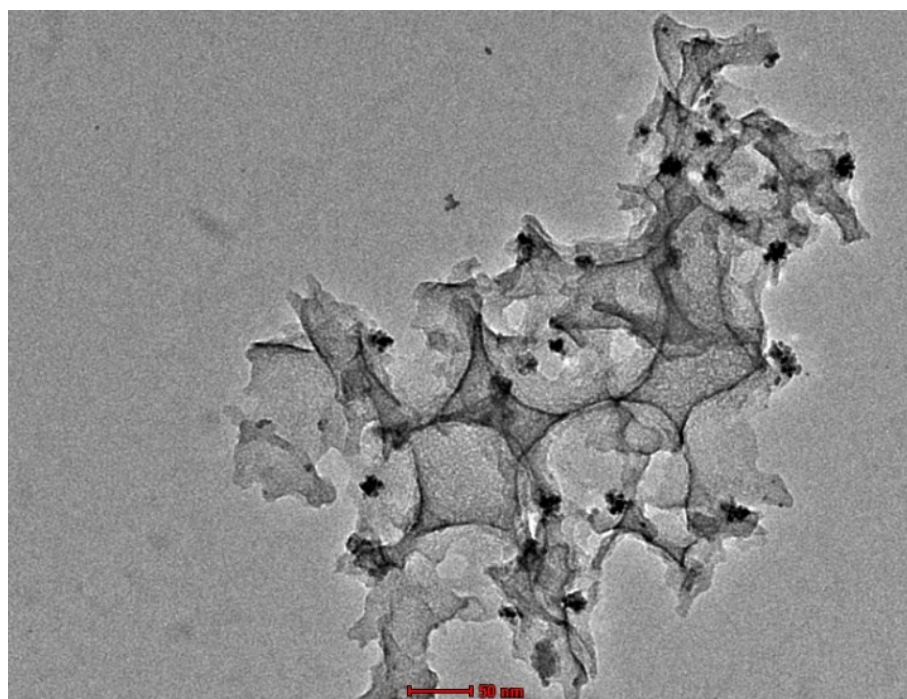

**Fig. S1** TEM image of Pd@POMs/MPC-3.

---

\* Corresponding author: Tel.: +86 0312 5079403; Fax: +86 0312 5079403.

E-mail address: [zyf@hbu.edu.cn](mailto:zyf@hbu.edu.cn) (Y.F. Zhang). [hyzhang@hbu.edu.cn](mailto:hyzhang@hbu.edu.cn) (H.Y. Zhang)

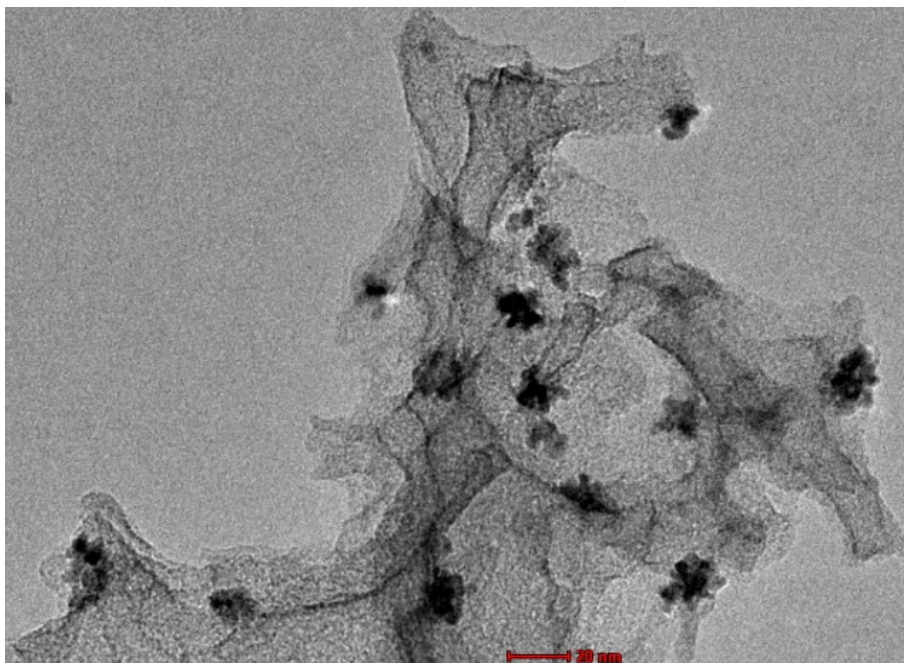

Fig. S2 TEM image of Pd@POMs/MPC-3.

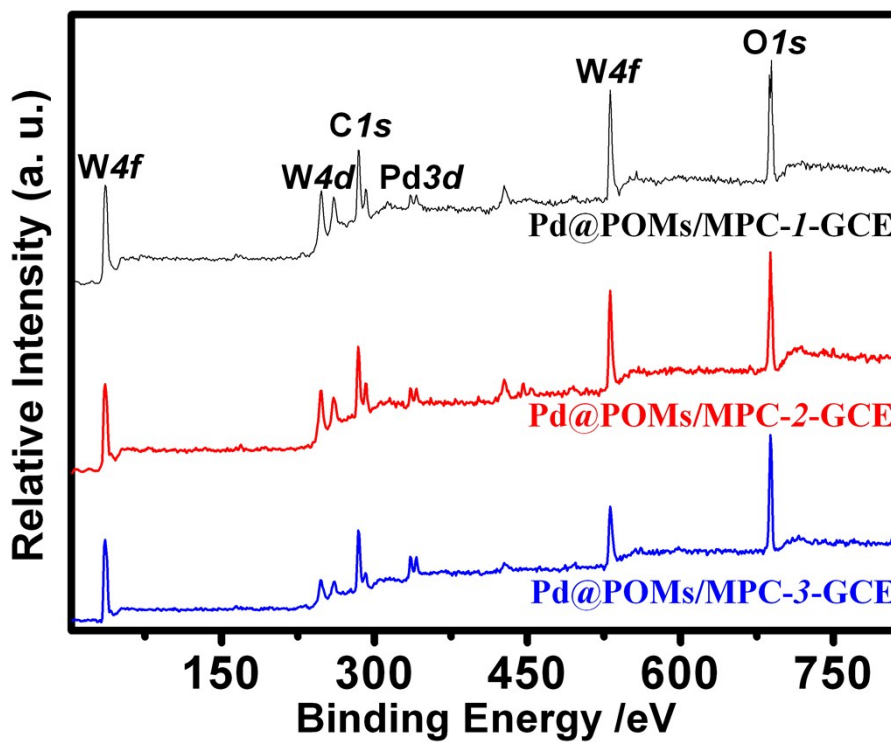

Fig. S3 The wide survey spectra of Pd@POMs/MPC-1, 2, and 3.

**Table S1** Elemental composition of Pd@POMs/MPC-1, 2, and 3

| Samples       | XPS (at %) |      |      |       |
|---------------|------------|------|------|-------|
|               | C          | Pd   | W    | O     |
| Pd@POMs/MPC-1 | 71.26      | 0.23 | 2.56 | 25.95 |
| Pd@POMs/MPC-2 | 70.23      | 0.86 | 3.87 | 25.04 |
| Pd@POMs/MPC-3 | 69.89      | 2.32 | 4.16 | 23.63 |

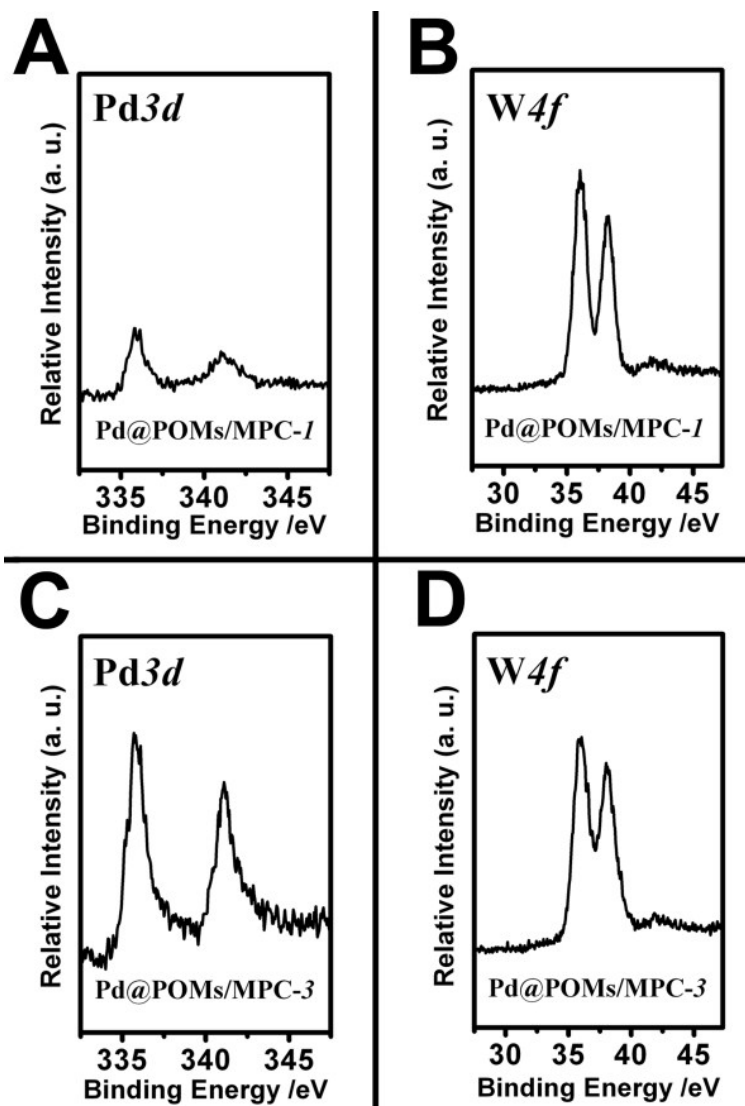

**Fig. S4** XPS spectra of the Pd 3d and W 4f in the Pd@POMs/MPC-1 and -3 nano hybrids.

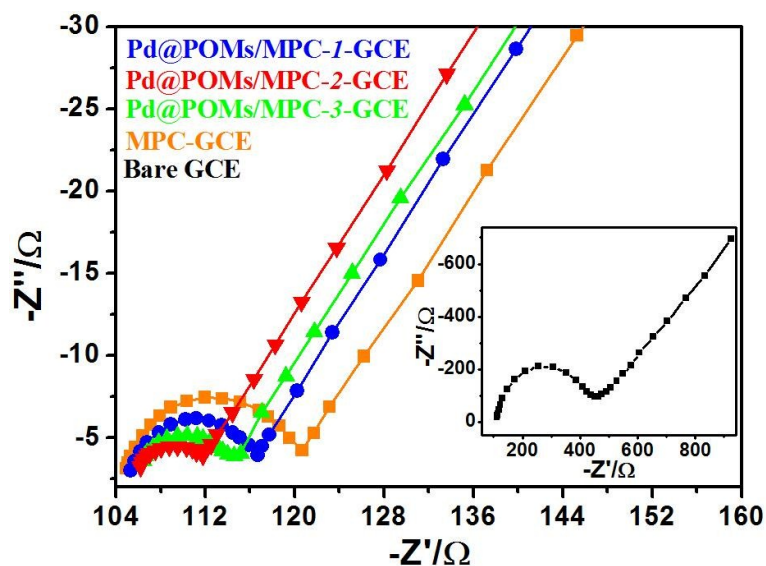

Fig. S5 EIS of as-prepared products in a 0.1 M KCl solution containing 5.0 mM  $K_3Fe(CN)_6$ – $K_4Fe(CN)_6$  and from 0.1 Hz to 10.0 KHz (A).

**Table S2** Comparison of the  $R_{ct}$  and responses of different electrodes towards to  $K_3Fe(CN)_6/K_4Fe(CN)_6$  (for five determinations)

| Electrode        | bare GCE | MPC–GCE | Pd@POMs/MPC-<br>1–GCE | Pd@POMs/MPC-<br>2–GCE | Pd@POMs/MPC-<br>3–GCE |
|------------------|----------|---------|-----------------------|-----------------------|-----------------------|
| $R_{ct}(\Omega)$ | 345.31   | 16.08   | 11.36                 | 6.18                  | 9.03                  |

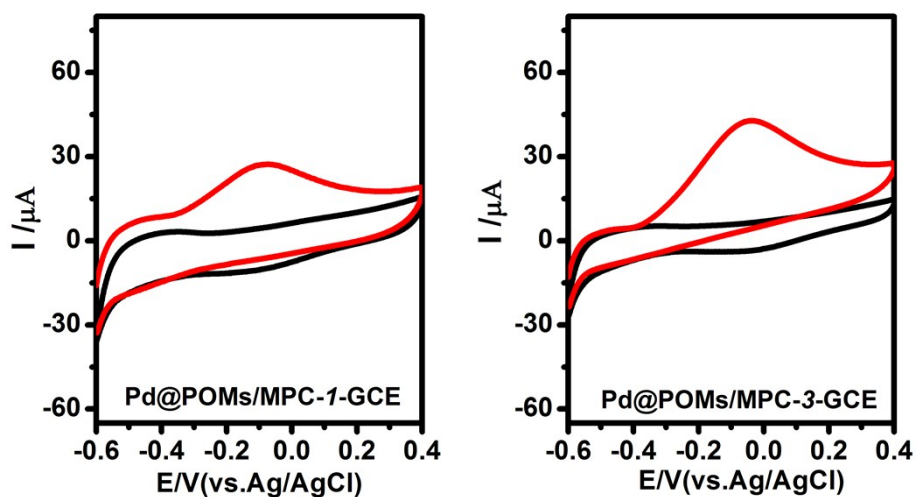

Fig. S6 CVs of Pd@POMs/MPC-1–GCE and Pd@POMs/MPC-3–GCE in the absence (black line) and presence (red line) of 100  $\mu$ M hydrazine (pH=7.0). Scan rate: 50  $mV s^{-1}$ .

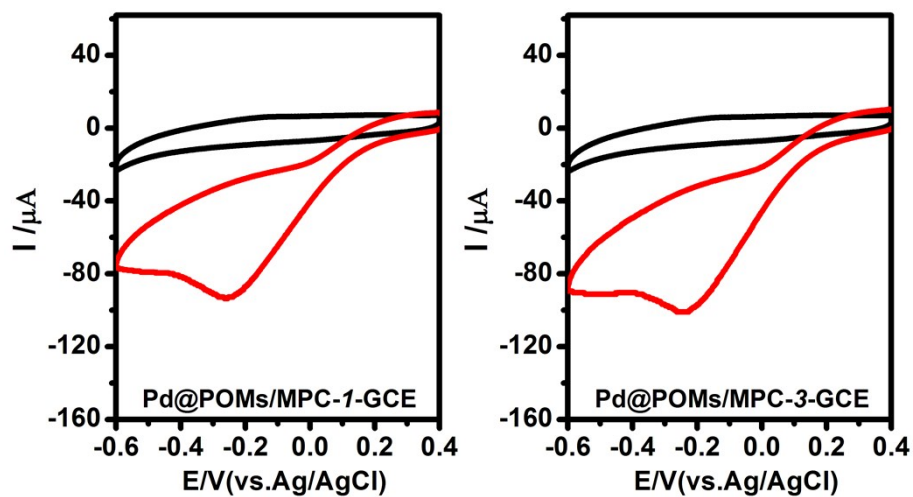

**Fig. S7** CVs of Pd@POMs/MPC-1-GCE and Pd@POMs/MPC-3-GCE in the absence (black line) and presence (red line) of 1.0 mM  $\text{H}_2\text{O}_2$  (pH=7.0). Scan rate:  $50 \text{ mV s}^{-1}$ .

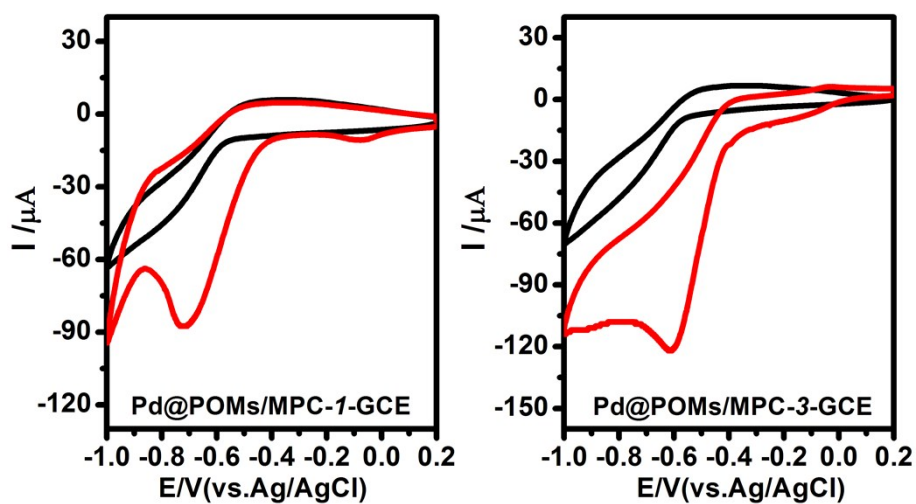

**Fig. S8** CVs of Pd@POMs/MPC-1-GCE and Pd@POMs/MPC-3-GCE in the absence (black line) and presence (red line) of  $100 \mu\text{M}$  NB (pH=7.0). Scan rate:  $50 \text{ mV s}^{-1}$ .

**Table S3** Comparison of the performance of the Pd@POMs/MPC-2-GCE for the electrochemical detection of hydrazine with that of other modified electrodes.

| Working electrode                                       | potential (V)           | Linear range<br>( $\mu\text{M}$ ) | sensitivity<br>( $\mu\text{A mM}^{-1}$ ) | Limit of<br>detection ( $\mu\text{M}$ ) | Response<br>time (s) | Reference |
|---------------------------------------------------------|-------------------------|-----------------------------------|------------------------------------------|-----------------------------------------|----------------------|-----------|
| RGO/ZnO–Au/GCE <sup>a</sup>                             | 0.1 (Ag/AgCl)           | 0.05-5                            | 393.34                                   | 0.018                                   | 3                    | 1         |
| PA6/PANI_ZnO/FTO <sup>b</sup>                           | 0.19 (Ag/AgCl)          | 0.5-5000                          | 61.77                                    | 0.35                                    | -                    | 2         |
| Ag/ZIF-8/CPE <sup>c</sup>                               | -0.05 (Ag/AgCl)         | 6-5000                            | 3.87                                     | 1.57                                    | 3                    | 3         |
| Co <sub>3</sub> O <sub>4</sub> NWs/GCE <sup>d</sup>     | 0.5 (Ag/AgCl)           | 20-700                            | 28.63                                    | 0.5                                     | -                    | 4         |
| Nafion–TiO <sub>2</sub> –CNT/GCE <sup>e</sup>           | 0.4 (Ag/AgCl)           | 0.35-162                          | 58                                       | 0.22                                    | 5                    | 5         |
| rGO–PxDA–Pd/GCE <sup>f</sup>                            | 0.1 (Ag/AgCl)           | 1-7433                            | 15.2                                     | 0.17                                    | 3                    | 6         |
| Co <sub>3</sub> O <sub>4</sub> /MWCNTs/GCE <sup>g</sup> | 0.5 (SCE <sup>l</sup> ) | 20-1100                           | 34.5                                     | 0.8                                     | 5                    | 7         |
| Pt–Cu@PSi/CILE <sup>h</sup>                             | 0 (Ag/AgCl)             | 0.2-1680                          | 10.35                                    | 0.05                                    | -                    | 8         |
| PNi–TPPS <sub>4</sub> –NPs/GCE <sup>i</sup>             | 0.55 (Ag/AgCl)          | 1-400                             | 0.99                                     | 0.11                                    | -                    | 9         |
| Au/PDTYB/MWCNTs/GCE <sup>j</sup>                        | 0.08 (Ag/AgCl)          | 2-350                             | 41.63                                    | 0.6                                     | -                    | 10        |
| PB@Ag/GF <sup>k</sup>                                   | 0.3 (Ag/AgCl)           | 0.5-8.5                           | 26.06                                    | 0.49                                    | 2                    | 11        |
| Pd@POMs/MPC-2-GCE                                       | 0 (Ag/AgCl)             | 2-2450                            | 62.8                                     | 0.82                                    | 4                    | This work |

a Reduced graphene oxide nanosheets/ZnO microspheres–Au nanoparticles modified glassy carbon electrode

b Polyamide 6/polyaniline (PA6/PANI) electrospun nanofibers decorated with ZnO nanoparticles modified fluorine doped tin oxide electrode

c Ag/zeolitic imidazolate frameworks nanocomposite modified glassy carbon electrode

d Porous Co<sub>3</sub>O<sub>4</sub> nanowire modified glassy carbon electrode

e Nafion–coated titanium oxide nanoparticle deposition on carbon nanotube surfaces modified glassy carbon electrode

f Graphene functionalized by benzylamine molecules and subsequently palladium modified glassy carbon electrode

g Co<sub>3</sub>O<sub>4</sub> nanoparticles decorated on the multi-walled carbon nanotubes modified glassy carbon electrode

h Pt–Cu nanoalloy was supported on the surface of porous silicon modified carbon ionic liquid electrode

i Poly-(5, 10, 15, 20-tetra (4-sulfophenyl) porphyrin–nickel)modified glassy carbon electrode

j Poly (4, 5-dihydro-1, 3-thiazol-2-ylsulfanyl-3-methyl-1, 2-benzenediol)–gold nanoparticles film on multi-walled carbon nanotubes modified glassy carbon electrode

k Prussian blue/silver nanoparticles modified freestanding graphite felt

l Saturated calomel electrode



**Table S4** Comparison of the performance of the Pd@POMs/MPC-2-GCE for the electrochemical detection of H<sub>2</sub>O<sub>2</sub> with that of other modified electrodes.

| Working electrode                                      | potential (V)            | Linear range<br>( $\mu\text{M}$ ) | sensitivity<br>( $\mu\text{A mM}^{-1}$ ) | Limit of<br>detection ( $\mu\text{M}$ ) | Response<br>time (s) | Reference |
|--------------------------------------------------------|--------------------------|-----------------------------------|------------------------------------------|-----------------------------------------|----------------------|-----------|
| Cu/PSi/CPE <sup>a</sup>                                | -0.2 (Ag/AgCl)           | 0.5-3780                          | 13.09                                    | 0.27                                    | 5                    | 12        |
| NP-PtAu/GCE <sup>b</sup>                               | 0.7 (RHE <sup>l</sup> )  | 50-2750                           | 1.43                                     | 0.1                                     | -                    | 13        |
| PpPDA@Fe <sub>3</sub> O <sub>4</sub> /GCE <sup>c</sup> | -0.4 (SCE <sup>m</sup> ) | 0.5-400                           | 76                                       | 0.21                                    | -                    | 14        |
| GF/Co <sub>3</sub> O <sub>4</sub> -NP/GCE <sup>d</sup> | -0.48 (Ag/AgCl)          | 0.2-211.5                         | 90.97                                    | 0.06                                    | 10                   | 15        |
| TOAB/ZnPp-C <sub>60</sub> /GCE <sup>e</sup>            | -1.17 (Ag/AgCl)          | 35-3400                           | 215.6                                    | 0.81                                    | 2                    | 16        |
| HRP/C-Dots/LDHs/GCE <sup>f</sup>                       | -0.35 (SCE)              | 0.1-23.1                          | 37.51                                    | 0.04                                    | -                    | 17        |
| Pt/Pt/GCE <sup>g</sup>                                 | 0.14 (Ag/AgCl)           | 1-1477                            | 27.22                                    | 0.5                                     | 3                    | 18        |
| Au NPs-N-GQDs/GCE <sup>h</sup>                         | -0.4 (Ag/AgCl)           | 0.25-13327                        | 14.86                                    | 0.12                                    | 5                    | 19        |
| PPy-Pt/GCE <sup>i</sup>                                | -0.175 (Ag/AgCl)         | 500-6300                          | 13.16                                    | 0.6                                     | -                    | 20        |
| graphene/pectin-CuNPs/GCE <sup>j</sup>                 | -0.24 (Ag/AgCl)          | 1-1000                            | 31.20                                    | 0.35                                    | -                    | 21        |
| Pt-MnO <sub>x</sub> @C/GCE <sup>k</sup>                | 0.4 (Ag/AgCl)            | 2-4000                            | 9.81                                     | 0.7                                     | -                    | 22        |
| Pd@POMs/MPC-2-GCE                                      | -0.17 (Ag/AgCl)          | 1-110<br>110-1710                 | 98.5<br>76.2                             | 0.36                                    | 2                    | This work |

a Copper on porous silicon nanocomposite modified carbon paste electrode

b Nanoporous Pt-Au alloy modified glassy carbon electrode

c Poly(*p*-phenylenediamine) (PpPDA)-Fe<sub>3</sub>O<sub>4</sub> nanocomposite modified glassy carbon electrode

d Graphene and cobalt oxide nanoparticles composite modified glassy carbon electrode

e Zinc porphyrin-fullerene was entrapped in tetraoctylammonium bromide film modified glassy carbon electrode

f Carbon nanodots and CoFe layered double hydroxide composites modified glassy carbon electrode

g Pt nanoparticles decorated porous grapheme nanocomposite modified glassy carbon electrode

h Au nanoparticles on nitrogen-doped graphene quantum dots modified glassy carbon electrode

i Polypyrrole/platinum nanocomposite modified glassy carbon electrode

j Graphene/pectin/copper nanoparticles modified glassy carbon electrode

k carbon supported Pt-MnO<sub>x</sub> nanoparticles modified glassy carbon electrode

l Reversible hydrogen electrode

m Saturated calomel electrode

**Table S5** Comparison of the performance of the Pd@POMs/MPC-2-GCE for the electrochemical detection of NB with that of other modified electrodes.

| Working electrode                         | potential (V)            | Linear range<br>( $\mu\text{M}$ ) | sensitivity<br>( $\mu\text{A mM}^{-1}$ ) | Limit of<br>detection ( $\mu\text{M}$ ) | Reference |
|-------------------------------------------|--------------------------|-----------------------------------|------------------------------------------|-----------------------------------------|-----------|
| RGO-AgNPs/GCE <sup>a</sup>                | -0.45 (Ag/AgCl)          | 0.5-900                           | 59.36                                    | 0.26                                    | 23        |
| Pd-GG-g-PAM-silica/GCE <sup>b</sup>       | -0.6 (SCE <sup>k</sup> ) | 1-3900                            | 26                                       | 0.06                                    | 24        |
| NPC/GCE <sup>c</sup>                      | -0.62 (Ag/AgCl)          | 2-100                             | 126                                      | 0.62                                    | 25        |
| PNMPC/Nafion/GCE <sup>d</sup>             | -0.7 (Ag/AgCl)           | 1-200                             | 6.93                                     | 0.05                                    | 26        |
| MMPCMs/GCE <sup>e</sup>                   | -0.64 (SCE)              | 0.2-40                            | 2360                                     | 0.008                                   | 27        |
| BiF/CPE <sup>f</sup>                      | -0.65 (SCE)              | 1-100                             | 289                                      | 0.83                                    | 28        |
| OMC/DDAB/GCE <sup>g</sup>                 | -0.5 (Ag/AgCl)           | 20-2900                           | -                                        | 10                                      | 29        |
| EAG/SPCE <sup>h</sup>                     | -0.624 (Ag/AgCl)         | 0.3-374.5                         | 102.6                                    | 0.06                                    | 30        |
| SiO <sub>2</sub> /Au NPs/GCE <sup>i</sup> | -0.74 (Ag/AgCl)          | 0.1-25                            | 102                                      | 0.1                                     | 31        |
| HMDE <sup>j</sup>                         | -0.8 (Ag/AgCl)           | 14.7-1000                         | -                                        | 5                                       | 32        |
| Pd@POMs/MPC-2-GCE                         | -0.59 (Ag/AgCl)          | 1-70<br>70-1000                   | 943.3<br>706.8                           | 0.42                                    | This work |

a Silver nanoparticles decorated reduced graphene oxide modified glassy carbon electrode

b Palladium nanoparticles decorated guar gum grafted polyacrylamide polymer-silica nanocomposite modified glassy carbon electrode

c Nitrogen doped porous carbon modified glassy carbon electrode

d Pt nanoparticles ensemble on macroporous carbon hybrid nanocomposites/Nafion modified glassy carbon electrode

e Macro-/meso-porous carbon materials were modified on the surface of a glassy carbon electrode

f A bismuth-film modified carbon paste electrode

g Ordered mesoporous carbon/didodecyldimethylammonium bromide composites film coated glassy carbon electrode

h Electrochemically activated graphite modified screen printed carbon electrode

i Silica-stabilized gold nanoparticles modified glassy carbon electrode

j Hanging mercury drop electrode

k Saturated calomel electrode



**Table S6** Comparison of responses of Pd@POMs/MPC-1, 2, and 3-GCE to hydrazine, H<sub>2</sub>O<sub>2</sub>, and NB

| Samples                       | Electrode         | Peak potential (V) | Peak current ( $\mu$ A) |
|-------------------------------|-------------------|--------------------|-------------------------|
| hydrazine                     | Pd@POMs/MPC-1-GCE | -0.09              | 23.51                   |
|                               | Pd@POMs/MPC-2-GCE | 0                  | 46.68                   |
|                               | Pd@POMs/MPC-3-GCE | -0.04              | 38.55                   |
| H <sub>2</sub> O <sub>2</sub> | Pd@POMs/MPC-1-GCE | -0.23              | 51.37                   |
|                               | Pd@POMs/MPC-2-GCE | -0.17              | 58.42                   |
|                               | Pd@POMs/MPC-3-GCE | -0.21              | 53.49                   |
| NB                            | Pd@POMs/MPC-1-GCE | -0.70              | 76.74                   |
|                               | Pd@POMs/MPC-2-GCE | -0.59              | 130.33                  |
|                               | Pd@POMs/MPC-3-GCE | -0.61              | 102.26                  |

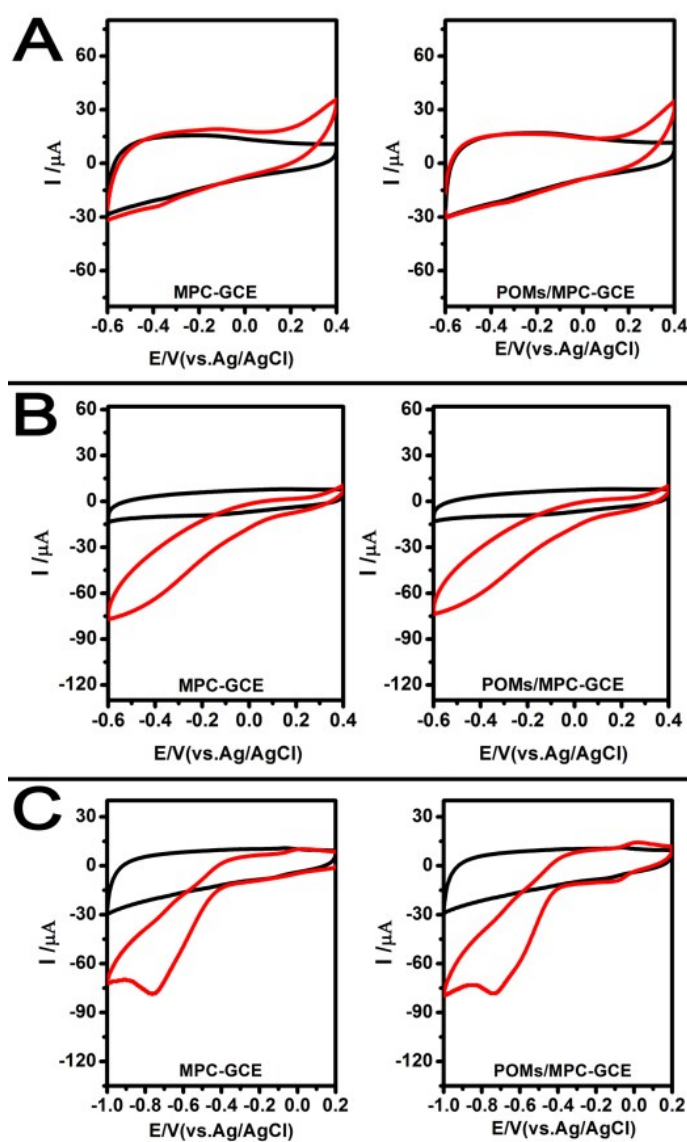**Fig. S9** CVs of POMs/MPC-GCE and MPC-GCE in the absence (black line) and presence (red line) of 100  $\mu$ M hydrazine (A), 1.0 mM H<sub>2</sub>O<sub>2</sub> (B), and 100  $\mu$ M NB (C). Scan rate: 50 mV s<sup>-1</sup>; pH=7.0.

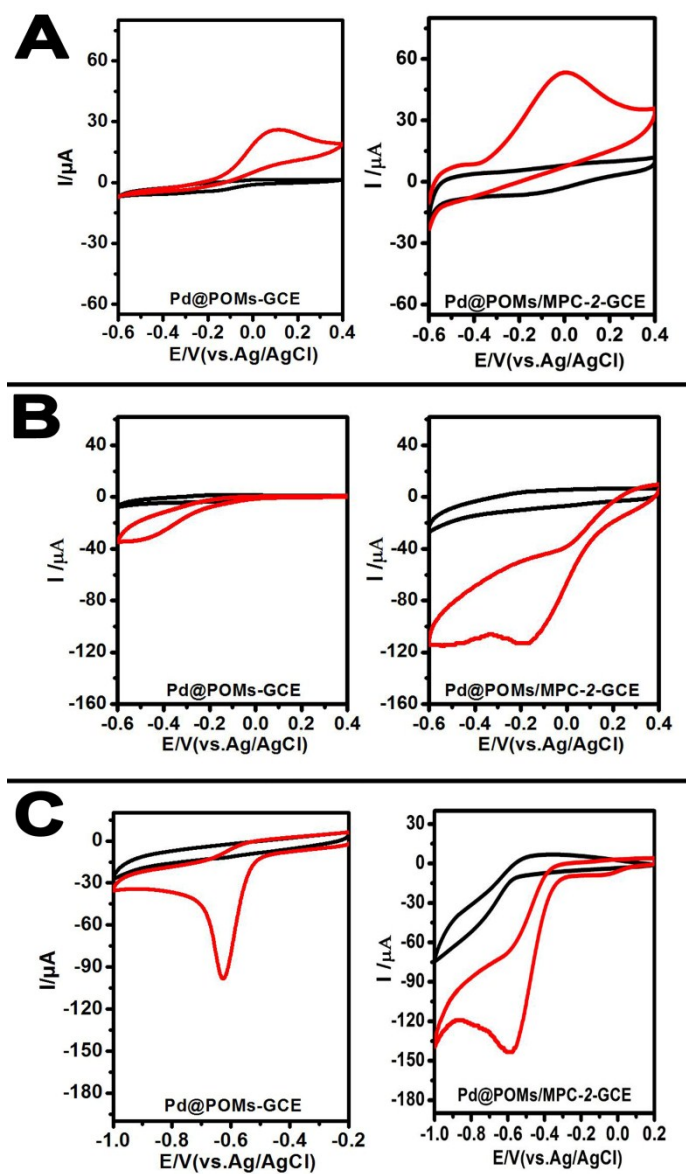

**Fig. S10** CVs of Pd@POMs-GCE and Pd@POMs/MPC-2-GCE in the absence (black line) and presence (red line) of 100  $\mu\text{M}$  hydrazine (A), 1.0 mM  $\text{H}_2\text{O}_2$  (B), and 100  $\mu\text{M}$  NB (C). Scan rate: 50  $\text{mV s}^{-1}$ ; pH=7.0.

## References

1. R. Madhu, B. Dinesh, S.-M. Chen, R. Saraswathi and V. Mani, *RSC Adv.*, 2015, **5**, 54379-54386.
2. R. S. Andre, A. Pavinatto, L. A. Mercante, E. C. Paris, L. H. C. Mattoso and D. S. Correa, *RSC Adv.*, 2015, **5**, 73875-73881.
3. A. Samadi-Maybodi, S. Ghasemi and H. Ghaffari-Rad, *Sens. Actuators, B*, 2015, **220**, 627-633.
4. J. Zhang, W. Gao, M. Dou, F. Wang, J. Liu, Z. Li and J. Ji, *Analyst*, 2015, **140**, 1686-1692.
5. S. P. Kim and H. C. Choi, *Sens. Actuators, B*, 2015, **207**, Part A, 424-429.
6. A. Ejaz, M. S. Ahmed and S. Jeon, *Sens. Actuators, B*, 2015, **221**, 1256-1263.
7. J. Zhang, H. Liu, M. Dou, F. Wang, J. Liu, Z. Li and J. Ji, *Electroanalysis*, 2015, **27**, 1188-1194.
8. A. A. Ensafi, M. M. Abarghoui and B. Rezaei, *Electrochim. Acta*, 2016, **190**, 199-207.
9. S. H. Kazemi, B. Hosseinzadeh and S. Zakavi, *Sens. Actuators, B*, 2015, **210**, 343-348.
10. A. R. Fakhari, H. Ahmar, H. Hosseini and S. Kazemi Movahed, *Sens. Actuators, B*, 2015, **213**, 82-91.
11. J. Zhao, J. Liu, S. Tricard, L. Wang, Y. Liang, L. Cao, J. Fang and W. Shen, *Electrochim. Acta*, 2015, **171**, 121-127.
12. A. A. Ensafi, M. M. Abarghoui and B. Rezaei, *Sens. Actuators, B*, 2014, **196**, 398-405.
13. J. Wang, H. Gao, F. Sun and C. Xu, *Sens. Actuators, B*, 2014, **191**, 612-618.
14. M. Baghayeri, E. Nazarzadeh Zare and M. Mansour Lakouraj, *Biosens. Bioelectron.*, 2014, **55**, 259-265.
15. C. Karuppiyah, S. Palanisamy, S.-M. Chen, V. Veeramani and P. Periakaruppan, *Sens. Actuators, B*, 2014, **196**, 450-456.
16. H. Wu, S. Fan, X. Jin, H. Zhang, H. Chen, Z. Dai and X. Zou, *Anal. Chem.*, 2014, **86**, 6285-6290.

17. Y. Wang, Z. Wang, Y. Rui and M. Li, *Biosens. Bioelectron.*, 2015, **64**, 57-62.
18. J. Liu, X. Bo, Z. Zhao and L. Guo, *Biosens. Bioelectron.*, 2015, **74**, 71-77.
19. J. Ju and W. Chen, *Anal. Chem.*, 2015, **87**, 1903-1910.
20. L. Xing, Q. Rong and Z. Ma, *Sens. Actuators, B*, 2015, **221**, 242-247.
21. V. Mani, R. Devasenathipathy, S.-M. Chen, S.-F. Wang, P. Devi and Y. Tai, *Electrochim. Acta*, 2015, **176**, 804-810.
22. H. Kivrak, O. Alal and D. Atbas, *Electrochim. Acta*, 2015, **176**, 497-503.
23. C. Karuppiyah, K. Muthupandi, S.-M. Chen, M. A. Ali, S. Palanisamy, A. Rajan, P. Prakash, F. M. A. Al-Hemaid and B.-S. Lou, *RSC Adv.*, 2015, **5**, 31139-31146.
24. P. K. Rastogi, V. Ganesan and S. Krishnamoorthi, *Electrochim. Acta*, 2014, **147**, 442-450.
25. L. Yan, X. Bo, Y. Zhang and L. Guo, *Electrochim. Acta*, 2014, **137**, 693-699.
26. Y. Zhang, L. Zeng, X. Bo, H. Wang and L. Guo, *Anal. Chim. Acta*, 2012, **752**, 45-52.
27. J. Ma, Y. Zhang, X. Zhang, G. Zhu, B. Liu and J. Chen, *Talanta*, 2012, **88**, 696-700.
28. L. Luo, X. Wang, Y. Ding, Q. Li, J. Jia and D. Deng, *Anal. Methods*, 2010, **2**, 1095-1100.
29. B. Qi, F. Lin, J. Bai, L. Liu and L. Guo, *Mater. Lett.*, 2008, **62**, 3670-3672.
30. B. Thirumalraj, S. Palanisamy and S. Chen, *Int. J. Electrochem. Sci.*, 2015, **10**, 4173-4182.
31. S. Singh, P. Devi, D. Singh, D. Jain and M. Singla, *Gold Bull.*, 2012, **45** (2), 75-81.
32. S. Liang, H. Zhang and D. Lu, *Environ. Monit. Assess.*, 2007, **129** (1-3), 331-337.
